# Supplementary material for: The Evolution of the COVID-19 Pandemic Through the Lens of Google Searches
Source: Research Square preprint supplement (doi:10.21203/rs.3.rs-1551521/v1), 2022-04-25
Supplement: Supplementary file 1 [file 0d1e1a98fe24c66b6c7d83da.pdf]

# The Evolution of the COVID-19 Pandemic Through the Lens of Google Searches

## Supplementary Information

The findings, interpretations, and conclusions expressed in this paper are entirely those of the authors. They do not necessarily represent the views of the World Bank and its affiliated organizations, or those of the Executive Directors of the World Bank or the governments they represent.

## Contents

|     |                                                                                                         |     |
|-----|---------------------------------------------------------------------------------------------------------|-----|
| S1  | Search terms queried for analysis                                                                       | S2  |
| S2  | Determining Language with Most Google Search Activity in Each Country                                   | S4  |
| S3  | Create consistent time-series of Google search interest                                                 | S8  |
| S4  | Correlation and lag between search interest and COVID-19 cases                                          | S10 |
| S5  | Map of correlations of Search Interest in “Loss of Smell” and “Fever” with COVID-19 Cases               | S12 |
| S6  | Search interest for loss of smell and COVID-19 cases for all countries with available data              | S13 |
| S7  | Trends in Search Interest and COVID-19 Cases Among Countries with Recent Surges in Cases                | S14 |
| S8  | Explaining Correlation Between Search Interest and COVID-19 Cases: Additional Results                   | S15 |
| S9  | Impact of Containment Policies on Search Interest: Event Study Results                                  | S18 |
| S10 | Impact of Containment Policies on Search Interest: Sensitivity Analysis Across Different Day Thresholds | S19 |
| S11 | Correlation of Daily Vaccination Rates and Search Interest, Separated by per Capita GDP                 | S23 |

## S1 Search terms queried for analysis

In this section we show the number of countries where there was sufficient Google search data (Google only releases search information if there is sufficient data [1]) for each search term, among countries with available COVID-19 case data. Table S1 provides information for search terms related to possible COVID-19 symptoms, table S2 provides information for search terms used to understand the impact of containment policies, and table S3 provides information for search terms related to demand for information about vaccines.

**Table S1:** Symptoms Search Terms: Number of countries with available Google search interest data for each search term

| Search Term              | N Countries |
|--------------------------|-------------|
| Ageusia                  | 81          |
| Anosmia                  | 102         |
| Coronavirus              | 201         |
| Cough                    | 186         |
| COVID Symptoms           | 138         |
| COVID-19                 | 200         |
| Fever                    | 195         |
| How to Treat Coronavirus | 42          |
| I Can't Smell            | 33          |
| I Can't Taste            | 16          |
| Loss of Smell            | 109         |
| Loss of Taste            | 105         |
| Pneumonia                | 175         |
| Shortness of Breath      | 130         |

**Table S2:** Impact of Containment Policy Search Terms: Number of countries with available Google search interest data for each search term

| Search Term            | N Countries |
|------------------------|-------------|
| Anxiety                | 171         |
| Anxiety Attack         | 74          |
| Boredom                | 117         |
| Debt                   | 185         |
| Divorce                | 181         |
| Emergency Pill         | 42          |
| File for Unemployment  | 23          |
| Insomnia               | 157         |
| Lonely                 | 177         |
| Panic                  | 166         |
| Pregnancy Test         | 156         |
| Social Distance        | 84          |
| Social Isolation       | 57          |
| Stay at Home           | 119         |
| Suicide                | 189         |
| Unemployment           | 180         |
| Unemployment Benefits  | 61          |
| Unemployment Insurance | 55          |
| Unemployment Office    | 36          |
| Wedding                | 203         |

**Table S3:** Vaccine Search Terms: Number of countries with available Google search interest data for each search term

| Search Term                                | N Countries |
|--------------------------------------------|-------------|
| Can I Get the COVID Vaccine                | 14          |
| COVID Microchip                            | 16          |
| COVID Vaccine                              | 123         |
| COVID Vaccine Appointment                  | 35          |
| COVID Vaccine Approved                     | 25          |
| COVID Vaccine Blood Clots                  | 15          |
| COVID Vaccine Cause Infertility            | 6           |
| COVID Vaccine Center                       | 39          |
| COVID Vaccine Change DNA                   | 6           |
| COVID Vaccine Dangerous                    | 21          |
| COVID Vaccine Infertility                  | 11          |
| COVID Vaccine Mercury                      | 5           |
| COVID Vaccine Microchip                    | 8           |
| COVID Vaccine Priority                     | 14          |
| COVID Vaccine Priority List                | 9           |
| COVID Vaccine Reaction                     | 19          |
| COVID Vaccine Safety                       | 24          |
| COVID Vaccine Second Dose                  | 45          |
| COVID Vaccine Sick                         | 19          |
| COVID Vaccine Side Effects                 | 82          |
| Does COVID Vaccine Change DNA              | 5           |
| Fear of Needles                            | 29          |
| Is COVID Vaccine Approved                  | 12          |
| Is the COVID Vaccine the Mark of the Beast | 4           |
| Ivermectin                                 | 163         |
| Long Term Effects of COVID Vaccine         | 13          |
| Needle Phobia                              | 22          |
| Safety of COVID Vaccine                    | 13          |
| Vaccine                                    | 198         |
| Vaccine Allergy                            | 30          |
| Vaccine Appointment                        | 50          |
| Vaccine Near Me                            | 33          |
| Vaccine Reaction                           | 36          |
| Where to Get COVID Vaccine                 | 19          |



## S2 Determining Language with Most Google Search Activity in Each Country

We use the following steps to determine the language with the highest Google search activity for each country:

- **Step 1:** For each search term  $t$ , query search interest across translated versions of the search term within the same query. We query weekly search interest for all of 2020. The translated versions of search term  $t$  are included in the same query, which ensures search interest values across the translated terms are comparable.
- **Step 2:** The above step produces search interest at the weekly level for each translated version of search term  $t$ . We take the average value across the time series, yielding one value per translated version of search term  $t$ .
- **Step 3:** For each search term  $t$ , we standardize values of search interest for translated terms so that the maximum value is 100. This step is done because, from the above step, values are only comparable within translated versions of search term  $t$ .
- **Step 4:** Across languages, take the average value from the above step. The language with the highest value is used at the language with the highest search interest.

Table S4 shows an illustrative example using a country where English, French and Spanish are the main languages spoken, where we just consider translations for three words: “fever”, “doctor” and “hospital”; in practice, we also use “food”, “restaurant” and “football.” The below example highlights the benefit of querying multiple search terms; the words for “doctor” and “hospital” are the same in English and Spanish, while the word for “fever” differs in English and Spanish. In addition, French sees the highest search activity for “fever” and “doctor” compared to English and Spanish versions; however, the French version of “hospital” sees slightly lower interest than the English and Spanish versions. Considering all search terms, though, indicates French will typically capture high search activity compared to searches in other languages. In step 3, standardizing allows comparing values between different search terms; and averaging these values in step 4 shows that French has the highest average search activity; consequently, for this country, we query Google search interest in French.

**Table S4:** Illustrative example of determining most common language for Google searches

|                                                                                                  | Fever                                        |        |         | Doctor  |         |         | Hospital |         |          |
|--------------------------------------------------------------------------------------------------|----------------------------------------------|--------|---------|---------|---------|---------|----------|---------|----------|
|                                                                                                  | English                                      | French | Spanish | English | French  | Spanish | English  | French  | Spanish  |
|                                                                                                  | Fever                                        | fièvre | fiebre  | doctor  | médecin | doctor  | hospital | hôpital | hospital |
| <b>Step 1:</b> Query weekly search interest for each translated search term                      |                                              |        |         |         |         |         |          |         |          |
| Week 1                                                                                           | 10                                           | 50     | 5       | 20      | 80      | 20      | 100      | 90      | 100      |
| Week 2                                                                                           | 50                                           | 100    | 10      | 10      | 75      | 10      | 60       | 70      | 60       |
| Week 3                                                                                           | 30                                           | 60     | 15      | 15      | 100     | 15      | 50       | 20      | 50       |
| <b>Step 2:</b> Take average values across time series                                            |                                              |        |         |         |         |         |          |         |          |
| Avg                                                                                              | 30                                           | 70     | 10      | 15      | 85      | 15      | 70       | 60      | 70       |
| <b>Step 3:</b> Standardize values within translated search terms so maximum value is 100         |                                              |        |         |         |         |         |          |         |          |
|                                                                                                  | 42.85                                        | 100    | 14.28   | 17.64   | 100     | 17.64   | 100      | 85.71   | 100      |
| <b>Step 4:</b> Average value across languages; French is used as it has the highest value below. |                                              |        |         |         |         |         |          |         |          |
|                                                                                                  | • English: $(42.85 + 17.64 + 100)/3 = 53.49$ |        |         |         |         |         |          |         |          |
|                                                                                                  | • French: $(100 + 100 + 85.71)/3 = 95.23$    |        |         |         |         |         |          |         |          |
|                                                                                                  | • Spanish: $(14.28 + 17.64 + 100)/3 = 43.97$ |        |         |         |         |         |          |         |          |

Table S5 shows, for each country, the language with the highest Google search activity and the average search activity for each language considered. For each country, we compare search interest in languages identified here: <https://github.com/annexare/Countries/blob/master/dist/countries.csv>.

**Table S5:** Google search activity across countries and languages

| Country                  | Language with Highest S.A. | Language and Search Activity (S.A.) |                 |                |                 |             |
|--------------------------|----------------------------|-------------------------------------|-----------------|----------------|-----------------|-------------|
|                          |                            | Name (S.A.)                         | Name (S.A.)     | Name (S.A.)    | Name (S.A.)     | Name (S.A.) |
| Andorra                  | Catalan                    | Catalan (100)                       |                 |                |                 |             |
| United Arab Emirates     | Arabic                     | Arabic (100)                        |                 |                |                 |             |
| Afghanistan              | Pashto                     | Pashto (75)                         | Turkmen (25)    | Uzbek (25)     |                 |             |
| Antigua & Barbuda        | English                    | English (100)                       |                 |                |                 |             |
| Anguilla                 | English                    | English (100)                       |                 |                |                 |             |
| Albania                  | Albanian                   | Albanian (100)                      |                 |                |                 |             |
| Armenia                  | Russian                    | Armenian (69.5)                     | Russian (76.2)  |                |                 |             |
| Angola                   | Portuguese                 | Portuguese (100)                    |                 |                |                 |             |
| Argentina                | Spanish                    | Spanish (100)                       |                 |                |                 |             |
| American Samoa           | English                    | English (99.7)                      | Samoan (14.3)   |                |                 |             |
| Austria                  | German                     | German (100)                        |                 |                |                 |             |
| Australia                | English                    | English (100)                       |                 |                |                 |             |
| Aruba                    | Dutch                      | Dutch (100)                         | Punjabi (0)     |                |                 |             |
| Azerbaijan               | Azerbaijani                | Azerbaijani (100)                   |                 |                |                 |             |
| Bosnia & Herzegovina     | Bosnian                    | Bosnian (93.4)                      | Croatian (81.7) | Serbian (0.1)  |                 |             |
| Barbados                 | English                    | English (100)                       |                 |                |                 |             |
| Bangladesh               | Bengali                    | Bengali (100)                       |                 |                |                 |             |
| Belgium                  | Dutch                      | German (16.6)                       | French (53.9)   | Dutch (78.1)   |                 |             |
| Burkina Faso             | French                     | French (100)                        |                 |                |                 |             |
| Bulgaria                 | Bulgarian                  | Bulgarian (100)                     |                 |                |                 |             |
| Bahrain                  | Arabic                     | Arabic (100)                        |                 |                |                 |             |
| Burundi                  | French                     | French (100)                        |                 |                |                 |             |
| Benin                    | French                     | French (100)                        |                 |                |                 |             |
| St. Barthélemy           | French                     | French (100)                        |                 |                |                 |             |
| Bermuda                  | English                    | English (100)                       |                 |                |                 |             |
| Brunei                   | Malay                      | Malay (100)                         |                 |                |                 |             |
| Bolivia                  | Spanish                    | Spanish (100)                       |                 |                |                 |             |
| Brazil                   | Portuguese                 | Portuguese (100)                    |                 |                |                 |             |
| Bahamas                  | English                    | English (100)                       |                 |                |                 |             |
| Botswana                 | English                    | English (100)                       |                 |                |                 |             |
| Belarus                  | Russian                    | Belarusian (15.4)                   | Russian (100)   |                |                 |             |
| Belize                   | English                    | English (100)                       | Spanish (35.5)  |                |                 |             |
| Canada                   | English                    | English (100)                       | French (30.5)   |                |                 |             |
| Congo - Kinshasa         | French                     | French (100)                        | Swahili (0.8)   |                |                 |             |
| Central African Republic | French                     | French (100)                        |                 |                |                 |             |
| Congo - Brazzaville      | French                     | French (100)                        |                 |                |                 |             |
| Switzerland              | German                     | German (86.7)                       | French (51.7)   | Italian (30.4) |                 |             |
| Côte d'Ivoire            | French                     | French (100)                        |                 |                |                 |             |
| Cook Islands             | English                    | English (100)                       |                 |                |                 |             |
| Chile                    | Spanish                    | Spanish (100)                       |                 |                |                 |             |
| Cameroon                 | English                    | English (97.9)                      | French (64.5)   |                |                 |             |
| China                    | Chinese                    | Chinese (100)                       |                 |                |                 |             |
| Colombia                 | Spanish                    | Spanish (100)                       |                 |                |                 |             |
| Costa Rica               | Spanish                    | Spanish (100)                       |                 |                |                 |             |
| Cuba                     | Spanish                    | Spanish (100)                       |                 |                |                 |             |
| Cape Verde               | Portuguese                 | Portuguese (100)                    |                 |                |                 |             |
| Curaçao                  | English                    | English (88.9)                      | Dutch (67.4)    | Punjabi (0)    |                 |             |
| Cyprus                   | Turkish                    | Greek (36)                          | Armenian (0)    | Turkish (94.5) |                 |             |
| Czechia                  | Czech                      | Czech (100)                         | Slovak (0.7)    |                |                 |             |
| Germany                  | German                     | German (100)                        |                 |                |                 |             |
| Djibouti                 | French                     | Arabic (2.5)                        | French (100)    | Somali (0)     |                 |             |
| Denmark                  | Danish                     | Danish (100)                        |                 |                |                 |             |
| Dominica                 | English                    | English (100)                       |                 |                |                 |             |
| Dominican Republic       | Spanish                    | Spanish (100)                       |                 |                |                 |             |
| Algeria                  | Arabic                     | Arabic (100)                        |                 |                |                 |             |
| Ecuador                  | Spanish                    | Spanish (100)                       |                 |                |                 |             |
| Estonia                  | Estonian                   | Estonian (100)                      |                 |                |                 |             |
| Egypt                    | Arabic                     | Arabic (100)                        |                 |                |                 |             |
| Eritrea                  | English                    | Arabic (0)                          | English (100)   |                |                 |             |
| Spain                    | Spanish                    | Catalan (46.6)                      | Spanish (85.8)  | Basque (0.3)   | Galician (47.5) |             |
| Ethiopia                 | Amharic                    | Amharic (100)                       |                 |                |                 |             |
| Finland                  | Finnish                    | Finnish (100)                       | Swedish (13.5)  |                |                 |             |
| Fiji                     | English                    | English (100)                       | Hindi (0)       | Urdu (0)       |                 |             |
| Falkland Islands         | English                    | English (100)                       |                 |                |                 |             |
| Micronesia               | English                    | English (100)                       |                 |                |                 |             |
| France                   | French                     | French (100)                        |                 |                |                 |             |
| Gabon                    | French                     | French (100)                        |                 |                |                 |             |
| United Kingdom           | English                    | English (100)                       |                 |                |                 |             |
| Grenada                  | English                    | English (100)                       |                 |                |                 |             |
| Georgia                  | Georgian                   | Georgian (100)                      |                 |                |                 |             |
| French Guiana            | French                     | French (100)                        |                 |                |                 |             |

|                          |            |                   |                     |                      |             |
|--------------------------|------------|-------------------|---------------------|----------------------|-------------|
| Guernsey                 | English    | English (100)     | French (28.6)       |                      |             |
| Ghana                    | English    | English (100)     |                     |                      |             |
| Gibraltar                | English    | English (100)     |                     |                      |             |
| Greenland                | Danish     | Danish (100)      |                     |                      |             |
| Gambia                   | English    | English (100)     |                     |                      |             |
| Guinea                   | French     | French (100)      |                     |                      |             |
| Guadeloupe               | French     | French (100)      |                     |                      |             |
| Equatorial Guinea        | Spanish    | Spanish (85.7)    | French (25.9)       |                      |             |
| Greece                   | Greek      | Greek (100)       |                     |                      |             |
| Guatemala                | Spanish    | Spanish (100)     |                     |                      |             |
| Guam                     | English    | English (100)     | Spanish (28.6)      |                      |             |
| Guinea-Bissau            | Portuguese | Portuguese (100)  |                     |                      |             |
| Guyana                   | English    | English (100)     |                     |                      |             |
| Hong Kong SAR China      | English    | English (83.9)    | Chinese (49.3)      |                      |             |
| Honduras                 | Spanish    | Spanish (100)     |                     |                      |             |
| Croatia                  | Croatian   | Croatian (100)    |                     |                      |             |
| Haiti                    | French     | French (86.3)     | Haitian Creole (34) |                      |             |
| Hungary                  | Hungarian  | Hungarian (100)   |                     |                      |             |
| Indonesia                | Indonesian | Indonesian (100)  |                     |                      |             |
| Ireland                  | English    | English (100)     | Irish (0.5)         |                      |             |
| Israel                   | Hebrew     | Arabic (44.9)     | Hebrew (57.1)       |                      |             |
| Isle of Man              | English    | English (100)     |                     |                      |             |
| India                    | English    | English (100)     | Hindi (5.7)         |                      |             |
| Iraq                     | Arabic     | Arabic (100)      | Kurdish (0.9)       |                      |             |
| Iran                     | Persian    | Persian (100)     |                     |                      |             |
| Iceland                  | Icelandic  | Icelandic (100)   |                     |                      |             |
| Italy                    | Italian    | Italian (100)     |                     |                      |             |
| Jersey                   | English    | English (100)     | French (28.6)       |                      |             |
| Jamaica                  | English    | English (100)     |                     |                      |             |
| Jordan                   | Arabic     | Arabic (100)      |                     |                      |             |
| Japan                    | Japanese   | Japanese (100)    |                     |                      |             |
| Kenya                    | English    | English (100)     | Swahili (5.6)       |                      |             |
| Kyrgyzstan               | Russian    | Kyrgyz (35.8)     | Russian (100)       |                      |             |
| Cambodia                 | Khmer      | Khmer (100)       |                     |                      |             |
| Kiribati                 | English    | English (100)     |                     |                      |             |
| Comoros                  | French     | Arabic (0)        | French (100)        |                      |             |
| St. Kitts & Nevis        | English    | English (100)     |                     |                      |             |
| North Korea              | Korean     | Korean (100)      |                     |                      |             |
| South Korea              | Korean     | Korean (100)      |                     |                      |             |
| Kuwait                   | Arabic     | Arabic (100)      |                     |                      |             |
| Cayman Islands           | English    | English (100)     |                     |                      |             |
| Kazakhstan               | Russian    | Kazakh (21.4)     | Russian (100)       |                      |             |
| Laos                     | Lao        | Lao (100)         |                     |                      |             |
| Lebanon                  | Arabic     | Arabic (85.3)     | French (41.2)       |                      |             |
| St. Lucia                | English    | English (100)     |                     |                      |             |
| Liechtenstein            | German     | German (100)      |                     |                      |             |
| Sri Lanka                | Sinhala    | Sinhala (83.3)    | Tamil (42.7)        |                      |             |
| Liberia                  | English    | English (100)     |                     |                      |             |
| Lesotho                  | English    | English (100)     | Sesotho (1.7)       |                      |             |
| Lithuania                | Lithuanian | Lithuanian (100)  |                     |                      |             |
| Luxembourg               | German     | German (85.1)     | French (66.8)       | Luxembourgish (24.9) |             |
| Latvia                   | Latvian    | Latvian (100)     |                     |                      |             |
| Libya                    | Arabic     | Arabic (100)      |                     |                      |             |
| Morocco                  | Arabic     | Arabic (100)      |                     |                      |             |
| Monaco                   | French     | French (100)      |                     |                      |             |
| Moldova                  | Romanian   | Romanian (100)    |                     |                      |             |
| Montenegro               | Bosnian    | Bosnian (85.7)    | Croatian (73.9)     | Albanian (14.5)      | Serbian (1) |
| St. Martin (French)      | English    | English (100)     | French (33.3)       | Dutch (16.7)         |             |
| Madagascar               | French     | French (88.3)     | Malagasy (51.3)     |                      |             |
| Marshall Islands         | English    | English (100)     |                     |                      |             |
| North Macedonia          | Macedonian | Macedonian (100)  |                     |                      |             |
| Mali                     | French     | French (100)      |                     |                      |             |
| Myanmar (Burma)          | Myanmar    | Myanmar (100)     |                     |                      |             |
| Mongolia                 | Mongolian  | Mongolian (100)   |                     |                      |             |
| Macao SAR China          | Chinese    | Portuguese (18.8) | Chinese (99.3)      |                      |             |
| Northern Mariana Islands | English    | English (100)     |                     |                      |             |
| Martinique               | French     | French (100)      |                     |                      |             |
| Mauritania               | Arabic     | Arabic (100)      |                     |                      |             |
| Montserrat               | English    | English (100)     |                     |                      |             |
| Malta                    | English    | English (100)     | Maltese (1.3)       |                      |             |
| Mauritius                | English    | English (100)     |                     |                      |             |
| Maldives                 | English    | Arabic (0.1)      | English (100)       |                      |             |
| Malawi                   | English    | English (100)     | Nyanja (0)          |                      |             |
| Mexico                   | Spanish    | Spanish (100)     |                     |                      |             |
| Malaysia                 | Malay      | Malay (100)       |                     |                      |             |
| Mozambique               | Portuguese | Portuguese (100)  |                     |                      |             |
| Namibia                  | English    | Afrikaans (18.3)  | English (100)       |                      |             |
| New Caledonia            | French     | French (100)      |                     |                      |             |
| Niger                    | French     | French (100)      |                     |                      |             |
| Nigeria                  | English    | English (100)     |                     |                      |             |
| Nicaragua                | Spanish    | Spanish (100)     |                     |                      |             |

|                          |            |                  |                |                    |             |            |
|--------------------------|------------|------------------|----------------|--------------------|-------------|------------|
| Netherlands              | Dutch      | Dutch (100)      |                |                    |             |            |
| Norway                   | Norwegian  | Norwegian (100)  |                |                    |             |            |
| Nepal                    | Nepali     | Nepali (100)     |                |                    |             |            |
| Nauru                    | English    | English (100)    |                |                    |             |            |
| Niue                     | English    | English (100)    |                |                    |             |            |
| New Zealand              | English    | English (100)    | Maori (3.3)    |                    |             |            |
| Oman                     | Arabic     | Arabic (100)     |                |                    |             |            |
| Panama                   | Spanish    | Spanish (100)    |                |                    |             |            |
| Peru                     | Spanish    | Spanish (100)    |                |                    |             |            |
| French Polynesia         | French     | French (100)     |                |                    |             |            |
| Papua New Guinea         | English    | English (100)    |                |                    |             |            |
| Philippines              | English    | English (100)    |                |                    |             |            |
| Pakistan                 | English    | English (100)    | Urdu (1)       |                    |             |            |
| Poland                   | Polish     | Polish (100)     |                |                    |             |            |
| St. Pierre & Miquelon    | French     | French (100)     |                |                    |             |            |
| Pitcairn Islands         | English    | English (100)    |                |                    |             |            |
| Puerto Rico              | English    | English (84.1)   | Spanish (79.7) |                    |             |            |
| Palestinian Territories  | Arabic     | Arabic (100)     |                |                    |             |            |
| Portugal                 | Portuguese | Portuguese (100) |                |                    |             |            |
| Palau                    | English    | English (100)    |                |                    |             |            |
| Paraguay                 | Spanish    | Spanish (100)    |                |                    |             |            |
| Qatar                    | Arabic     | Arabic (100)     |                |                    |             |            |
| Réunion                  | French     | French (100)     |                |                    |             |            |
| Romania                  | Romanian   | Romanian (100)   |                |                    |             |            |
| Serbia                   | Serbian    | Serbian (100)    |                |                    |             |            |
| Russia                   | Russian    | Russian (100)    |                |                    |             |            |
| Rwanda                   | English    | English (100)    | French (29.9)  | Kinyarwanda (17.3) |             |            |
| Saudi Arabia             | Arabic     | Arabic (100)     |                |                    |             |            |
| Solomon Islands          | English    | English (100)    |                |                    |             |            |
| Seychelles               | English    | English (100)    | French (28.6)  |                    |             |            |
| Sudan                    | Arabic     | Arabic (76.1)    | English (68.4) |                    |             |            |
| Sweden                   | Swedish    | Swedish (100)    |                |                    |             |            |
| Singapore                | English    | English (100)    | Malay (15.8)   | Tamil (0)          | Chinese (7) |            |
| St. Helena               | English    | English (100)    |                |                    |             |            |
| Slovenia                 | Slovenian  | Slovenian (100)  |                |                    |             |            |
| Slovakia                 | Slovak     | Slovak (100)     |                |                    |             |            |
| Sierra Leone             | English    | English (100)    |                |                    |             |            |
| San Marino               | Italian    | Italian (100)    |                |                    |             |            |
| Senegal                  | French     | French (100)     |                |                    |             |            |
| Somalia                  | English    | Arabic (4.8)     | English (100)  | Somali (1.3)       |             |            |
| Suriname                 | Dutch      | Dutch (100)      |                |                    |             |            |
| South Sudan              | English    | English (100)    |                |                    |             |            |
| São Tomé & Príncipe      | Portuguese | Portuguese (100) |                |                    |             |            |
| El Salvador              | Spanish    | Spanish (100)    |                |                    |             |            |
| Sint Maarten             | English    | English (100)    | Dutch (14.3)   |                    |             |            |
| Syria                    | Arabic     | Arabic (100)     |                |                    |             |            |
| Eswatini                 | English    | English (100)    |                |                    |             |            |
| Turks & Caicos Islands   | English    | English (100)    |                |                    |             |            |
| Chad                     | French     | Arabic (0.8)     | French (100)   |                    |             |            |
| Togo                     | French     | French (100)     |                |                    |             |            |
| Thailand                 | Thai       | Thai (100)       |                |                    |             |            |
| Tajikistan               | Russian    | Russian (100)    | Tajik (20.5)   |                    |             |            |
| Tokelau                  | English    | English (100)    |                |                    |             |            |
| Timor-Leste              | Portuguese | Portuguese (100) |                |                    |             |            |
| Turkmenistan             | Russian    | Russian (99.6)   | Turkmen (29.9) |                    |             |            |
| Tunisia                  | Arabic     | Arabic (100)     |                |                    |             |            |
| Tonga                    | English    | English (100)    |                |                    |             |            |
| Turkey                   | Turkish    | Turkish (100)    |                |                    |             |            |
| Trinidad & Tobago        | English    | English (100)    |                |                    |             |            |
| Tuvalu                   | English    | English (100)    |                |                    |             |            |
| Taiwan                   | Chinese    | Chinese (100)    |                |                    |             |            |
| Tanzania                 | English    | English (100)    | Swahili (22.3) |                    |             |            |
| Ukraine                  | Ukrainian  | Ukrainian (100)  |                |                    |             |            |
| Uganda                   | English    | English (100)    | Swahili (0.3)  |                    |             |            |
| United States            | English    | English (100)    |                |                    |             |            |
| Uruguay                  | Spanish    | Spanish (100)    |                |                    |             |            |
| Uzbekistan               | Russian    | Russian (87.9)   | Uzbek (44.2)   |                    |             |            |
| St. Vincent & Grenadines | English    | English (100)    |                |                    |             |            |
| Venezuela                | Spanish    | Spanish (100)    |                |                    |             |            |
| British Virgin Islands   | English    | English (100)    |                |                    |             |            |
| U.S. Virgin Islands      | English    | English (100)    |                |                    |             |            |
| Vietnam                  | Vietnamese | Vietnamese (100) |                |                    |             |            |
| Vanuatu                  | English    | English (100)    | French (28.6)  |                    |             |            |
| Wallis & Futuna          | French     | French (100)     |                |                    |             |            |
| Samoa                    | English    | English (100)    | Samoan (0.5)   |                    |             |            |
| Yemen                    | Arabic     | Arabic (100)     |                |                    |             |            |
| Mayotte                  | French     | French (100)     |                |                    |             |            |
| South Africa             | English    | Afrikaans (17.6) | English (100)  | Sesotho (0.2)      | Xhosa (0)   | Zulu (0.1) |
| Zambia                   | English    | English (100)    |                |                    |             |            |
| Zimbabwe                 | English    | English (100)    | Shona (0.5)    |                    |             |            |

### S3 Create consistent time-series of Google search interest

Google trends provides a scaled index of search interest that ranges between 0 and 100 across a specific time range and geographic region [1]. Google only allows querying data for a time range of up to 270 days; consequently, to create a consistent time series from September 1, 2018 to December 31, 2021, we query data for seven different time ranges. Given that Google scales values between 0 and 100 for each query, the values across different the different time series queries will not be comparable.

To create a consistent time series, we query data across time ranges that overlap. Specifically, we query data for:

- September 1, 2018 - May 28, 2019
- January 1, 2019 - September 27, 2019
- July 1, 2019 - March 26, 2020
- January 1, 2020 - September 26, 2020
- July 5, 2020 - March 31, 2021
- January 4, 2021 - September 30, 2021
- April 6, 2021 - December 31, 2021

We then use search interest in the overlapping time periods to scale the full range of data so that the range of values within overlapping time spans are the same. Specifically, we use the below equation<sup>1</sup>:

$$\frac{m - r_{min}}{r_{max} - r_{min}} \times (t_{max} - t_{min}) + t_{min} \quad (1)$$

where:

- $r_{min}$  is the minimum value from the values to be scaled
- $r_{max}$  is the maximum value from the values to be scaled
- $t_{min}$  is the minimum of the target scaling
- $t_{max}$  is the maximum of the target scaling
- $m \in [r_{min}, r_{max}]$  is the value to be scaled

and where  $r_{min}$ ,  $r_{max}$ ,  $t_{min}$ ,  $t_{max}$  are determined from the set of values from the two time series where the dates overlap, and  $m$  is the full range of search interest values from the query. Figure S1 shows an example using search interest for “fever” in the United States; the figure shows both the raw values from the original search interest query (panel A) and the resulting consistent time series (panel B).

---

<sup>1</sup>This equation is described in this stack overflow post: <https://stats.stackexchange.com/questions/281162/scale-a-number-between-a-range>

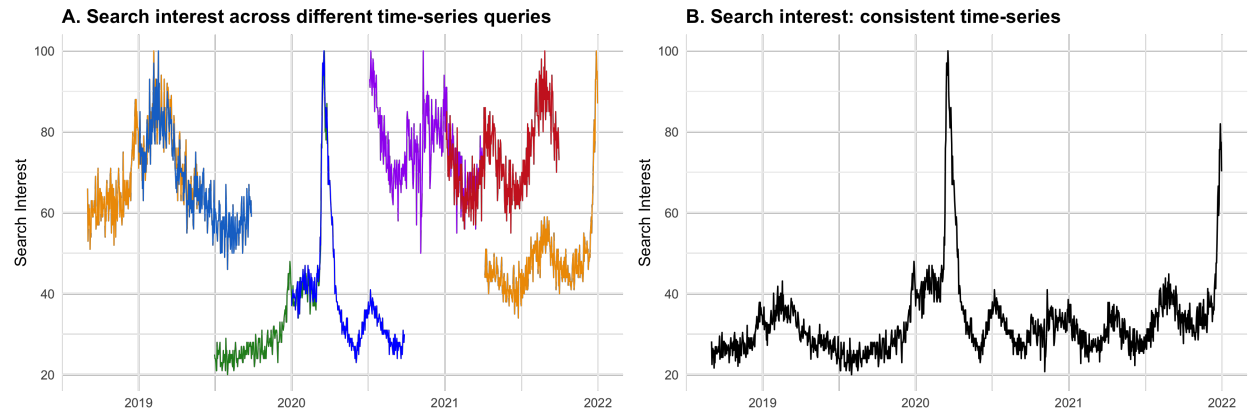

**Figure S1:** Creating a consistent time series of google search interest for search interest in “fever” for the United States. **Panel A** shows the raw search interest values across queries for search interest across different date ranges. Each query is scaled so its maximum value is 100. **Panel B** shows a consistent time series, creating from scaling values

## S4 Correlation and lag between search interest and COVID-19 cases

Table S6 summarizes the distribution of the correlation between search interest and COVID-19 cases across countries as well as the distribution of the lag of COVID-19 cases that resulted in the highest correlation with search interest. Figure S2 compares the distribution of the original correlation and the correlation when using the optimal lag of COVID-19 cases.

**Table S6:** Correlation between search interest and COVID-19 Cases

| Term                              | Using data in 2020 |       |        |       |       |       |      |     | Using data in 2021 |       |        |      |      |       |      |     |
|-----------------------------------|--------------------|-------|--------|-------|-------|-------|------|-----|--------------------|-------|--------|------|------|-------|------|-----|
|                                   | Min                | 5th   | 25th   | 50th  | 75th  | 95th  | Max  | N   | Min                | 5th   | 25th   | 50th | 75th | 95th  | Max  | N   |
| <b>Correlation</b>                |                    |       |        |       |       |       |      |     |                    |       |        |      |      |       |      |     |
| Ageusia                           | -0.42              | -0.2  | -0.04  | 0.09  | 0.24  | 0.46  | 0.66 | 77  | -0.44              | -0.2  | -0.06  | 0.08 | 0.19 | 0.39  | 0.74 | 67  |
| Shortness of Breath               | -0.41              | -0.18 | -0.08  | 0.04  | 0.16  | 0.39  | 0.58 | 128 | -0.38              | -0.18 | -0.05  | 0.11 | 0.29 | 0.54  | 0.97 | 118 |
| Fever                             | -0.54              | -0.37 | -0.14  | 0     | 0.14  | 0.39  | 0.49 | 185 | -0.32              | -0.16 | -0.03  | 0.15 | 0.33 | 0.7   | 0.9  | 189 |
| Cough                             | -0.65              | -0.34 | -0.18  | -0.07 | 0.12  | 0.28  | 0.59 | 179 | -0.58              | -0.19 | 0.02   | 0.17 | 0.36 | 0.62  | 0.92 | 177 |
| Anosmia                           | -0.17              | -0.1  | 0.02   | 0.15  | 0.33  | 0.58  | 0.75 | 99  | -0.32              | -0.1  | 0.01   | 0.13 | 0.28 | 0.57  | 0.82 | 87  |
| How to Treat Coronavirus          | -0.35              | -0.31 | -0.14  | -0.05 | 0.23  | 0.53  | 0.74 | 42  | -0.06              | -0.05 | 0.08   | 0.2  | 0.38 | 0.57  | 0.58 | 32  |
| I Can't Taste                     | -0.28              | -0.18 | 0.03   | 0.07  | 0.26  | 0.57  | 0.82 | 15  | -0.18              | -0.13 | -0.01  | 0.18 | 0.3  | 0.57  | 0.61 | 15  |
| Coronavirus                       | -0.53              | -0.47 | -0.3   | -0.19 | -0.07 | 0.23  | 0.69 | 191 | -0.37              | -0.18 | 0.02   | 0.2  | 0.49 | 0.72  | 0.9  | 198 |
| Covid-19                          | -0.36              | -0.19 | -0.05  | 0.09  | 0.26  | 0.5   | 0.85 | 191 | -0.43              | -0.14 | 0.04   | 0.2  | 0.43 | 0.71  | 0.88 | 195 |
| Pneumonia                         | -0.52              | -0.28 | -0.13  | -0.04 | 0.16  | 0.53  | 0.8  | 164 | -0.39              | -0.15 | -0.01  | 0.16 | 0.39 | 0.73  | 0.98 | 160 |
| I Can't Smell                     | -0.17              | -0.15 | 0.01   | 0.18  | 0.41  | 0.66  | 0.76 | 33  | -0.26              | -0.05 | 0.01   | 0.08 | 0.29 | 0.59  | 0.7  | 29  |
| Loss of Taste                     | -0.14              | -0.1  | 0.13   | 0.34  | 0.54  | 0.8   | 0.93 | 99  | -0.34              | -0.06 | 0.1    | 0.25 | 0.42 | 0.69  | 0.9  | 98  |
| Covid Symptoms                    | -0.2               | -0.1  | 0.11   | 0.28  | 0.56  | 0.75  | 0.8  | 132 | -0.2               | -0.05 | 0.19   | 0.39 | 0.59 | 0.82  | 0.95 | 129 |
| Loss of Smell                     | -0.19              | -0.1  | 0.12   | 0.42  | 0.62  | 0.82  | 0.92 | 104 | -0.15              | -0.06 | 0.08   | 0.3  | 0.49 | 0.78  | 0.9  | 98  |
| <b>Correlation using best lag</b> |                    |       |        |       |       |       |      |     |                    |       |        |      |      |       |      |     |
| Ageusia                           | -0.38              | -0.15 | 0.03   | 0.21  | 0.36  | 0.62  | 0.77 | 77  | -0.38              | -0.07 | 0.03   | 0.15 | 0.31 | 0.47  | 0.76 | 67  |
| Shortness of Breath               | -0.3               | -0.11 | 0.02   | 0.14  | 0.26  | 0.46  | 0.72 | 128 | -0.26              | -0.12 | 0.09   | 0.22 | 0.37 | 0.56  | 0.97 | 118 |
| Fever                             | -0.41              | -0.28 | -0.06  | 0.1   | 0.27  | 0.47  | 0.75 | 185 | -0.28              | -0.06 | 0.1    | 0.24 | 0.4  | 0.78  | 0.94 | 189 |
| Cough                             | -0.6               | -0.31 | -0.12  | 0.02  | 0.18  | 0.4   | 0.75 | 179 | -0.5               | -0.15 | 0.12   | 0.27 | 0.47 | 0.69  | 0.95 | 177 |
| Anosmia                           | -0.14              | -0.06 | 0.11   | 0.29  | 0.44  | 0.66  | 0.83 | 99  | -0.19              | -0.05 | 0.11   | 0.25 | 0.37 | 0.58  | 0.88 | 87  |
| How to Treat Coronavirus          | -0.3               | -0.28 | -0.1   | 0.07  | 0.45  | 0.71  | 0.75 | 42  | -0.05              | -0.02 | 0.17   | 0.3  | 0.53 | 0.62  | 0.69 | 32  |
| I Can't Taste                     | -0.22              | -0.02 | 0.14   | 0.23  | 0.37  | 0.63  | 0.82 | 15  | -0.08              | -0.06 | 0.11   | 0.26 | 0.38 | 0.58  | 0.61 | 15  |
| Coronavirus                       | -0.5               | -0.4  | -0.25  | -0.11 | 0.04  | 0.54  | 0.91 | 191 | -0.28              | -0.13 | 0.09   | 0.32 | 0.53 | 0.74  | 0.93 | 198 |
| Covid-19                          | -0.32              | -0.13 | 0.02   | 0.19  | 0.36  | 0.67  | 0.86 | 191 | -0.3               | -0.09 | 0.13   | 0.32 | 0.51 | 0.76  | 0.89 | 195 |
| Pneumonia                         | -0.42              | -0.25 | -0.09  | 0.06  | 0.27  | 0.61  | 0.87 | 164 | -0.37              | -0.07 | 0.09   | 0.29 | 0.5  | 0.79  | 0.98 | 160 |
| I Can't Smell                     | -0.14              | -0.13 | 0.05   | 0.32  | 0.45  | 0.73  | 0.84 | 33  | -0.15              | 0.05  | 0.14   | 0.29 | 0.37 | 0.65  | 0.82 | 29  |
| Loss of Taste                     | -0.14              | -0.06 | 0.22   | 0.45  | 0.63  | 0.9   | 0.97 | 99  | -0.14              | -0.01 | 0.2    | 0.31 | 0.49 | 0.74  | 0.97 | 98  |
| Covid Symptoms                    | -0.17              | -0.05 | 0.23   | 0.43  | 0.67  | 0.83  | 0.95 | 132 | -0.2               | 0.04  | 0.3    | 0.49 | 0.67 | 0.88  | 0.99 | 129 |
| Loss of Smell                     | -0.17              | -0.07 | 0.27   | 0.53  | 0.74  | 0.91  | 0.95 | 104 | -0.13              | -0.01 | 0.21   | 0.4  | 0.54 | 0.82  | 0.97 | 98  |
| <b>Lag with best correlation</b>  |                    |       |        |       |       |       |      |     |                    |       |        |      |      |       |      |     |
| Ageusia                           | -21                | -21   | -21    | -10   | 8     | 21    | 21   | 77  | -21                | -21   | -17.5  | -1   | 16   | 21    | 21   | 67  |
| Shortness of Breath               | -21                | -21   | -18    | -10   | 0     | 21    | 21   | 128 | -21                | -21   | -11    | 2    | 17   | 21    | 21   | 118 |
| Fever                             | -21                | -21   | -19    | -8    | 4     | 21    | 21   | 185 | -21                | -21   | -16    | -6   | 5    | 21    | 21   | 189 |
| Cough                             | -21                | -21   | -18    | -8    | 2.5   | 21    | 21   | 179 | -21                | -21   | -17    | -7   | 2    | 21    | 21   | 177 |
| Anosmia                           | -21                | -21   | -20.5  | -12   | -4    | 21    | 21   | 99  | -21                | -21   | -16.5  | -4   | 11.5 | 21    | 21   | 87  |
| How to Treat Coronavirus          | -21                | -21   | -21    | -14.5 | -5.75 | 11.8  | 21   | 42  | -21                | -21   | -18    | -9   | 3    | 17.15 | 21   | 32  |
| I Can't Taste                     | -21                | -21   | -21    | -14   | -0.5  | 21    | 21   | 15  | -21                | -21   | -19    | -12  | 2.5  | 11.2  | 14   | 15  |
| Coronavirus                       | -21                | -21   | -21    | -19   | -9.5  | -2    | 21   | 191 | -21                | -21   | -12    | -3   | 5    | 21    | 21   | 198 |
| Covid-19                          | -21                | -21   | -21    | -16   | -7    | 6     | 21   | 191 | -21                | -21   | -12.5  | -3   | 6    | 21    | 21   | 195 |
| Pneumonia                         | -21                | -21   | -15.25 | -8    | 5     | 21    | 21   | 164 | -21                | -21   | -14    | -3   | 9    | 21    | 21   | 160 |
| I Can't Smell                     | -21                | -21   | -17    | -8    | 1     | 19.2  | 21   | 33  | -21                | -21   | -12    | -2   | 14   | 21    | 21   | 29  |
| Loss of Taste                     | -21                | -21   | -21    | -13   | -4.5  | 21    | 21   | 99  | -21                | -21   | -10.75 | -2.5 | 8    | 21    | 21   | 98  |
| Covid Symptoms                    | -21                | -21   | -21    | -12.5 | -5    | 12    | 20   | 132 | -21                | -21   | -11    | -5   | 1    | 19    | 21   | 129 |
| Loss of Smell                     | -21                | -21   | -18.25 | -12   | -2.75 | 18.55 | 21   | 104 | -21                | -21   | -14    | -6.5 | 2    | 21    | 21   | 98  |

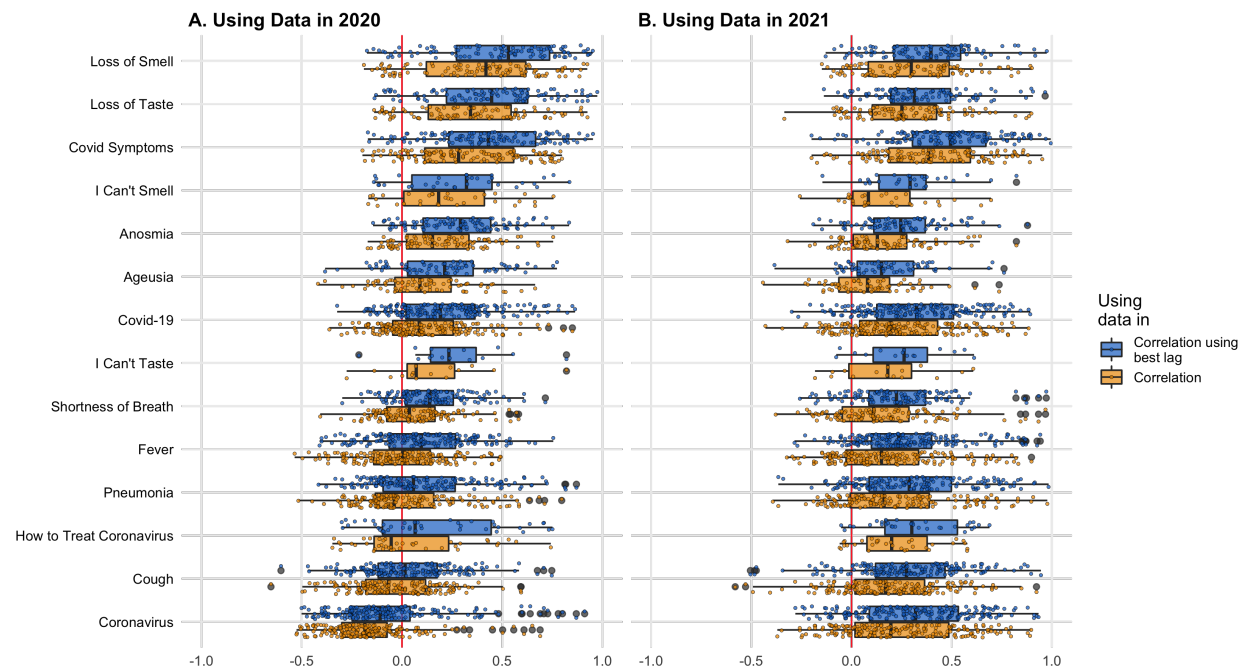

**Figure S2:** Distribution of correlation between search interest and COVID-19 cases using the original correlation and the correlation when using the lagged value of COVID-19 cases that produced the highest correlation. The boxplots include: center line, median; box limits, upper and lower quartiles; whiskers, 1.5x interquartile range; points beyond whiskers, outliers.



## S5 Map of correlations of Search Interest in “Loss of Smell” and “Fever” with COVID-19 Cases

Figure S3 shows a map of the correlations using “Loss of Smell” and a more general symptom (“Fever”); the figure illustrates how the correlation between COVID-19 cases and search interest in “Loss of Smell” is strong throughout different geographic regions. In addition, the figure illustrates that while search interest in more general symptoms such as “Fever” tend to have a lower correlation, these terms tend to have data across more countries—where in some countries, the search terms still work well.

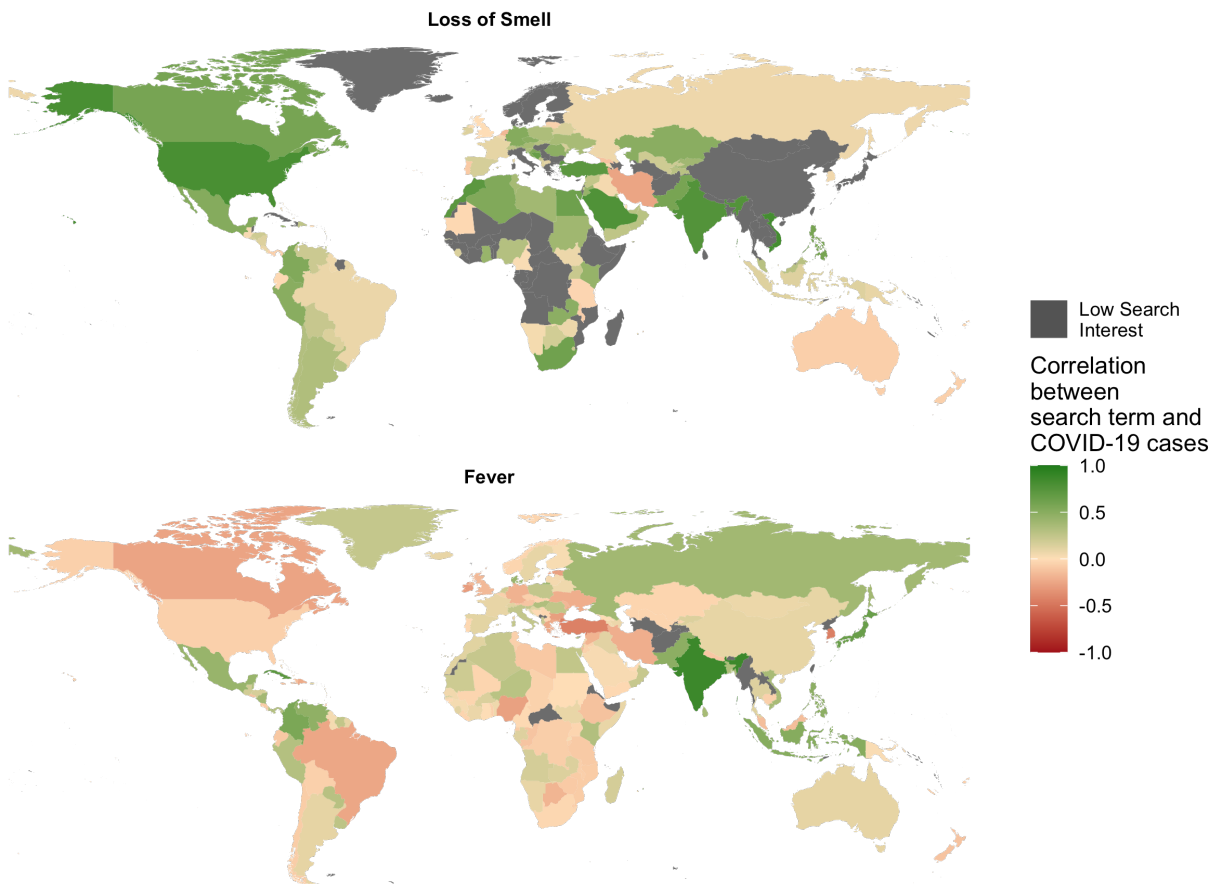

**Figure S3:** Trends between search interest and COVID-19 Cases for Select Countries

## S6 Search interest for loss of smell and COVID-19 cases for all countries with available data

Figure S4 shows trends in search interest in “Loss of Smell” and COVID-19 cases for all countries with available data.

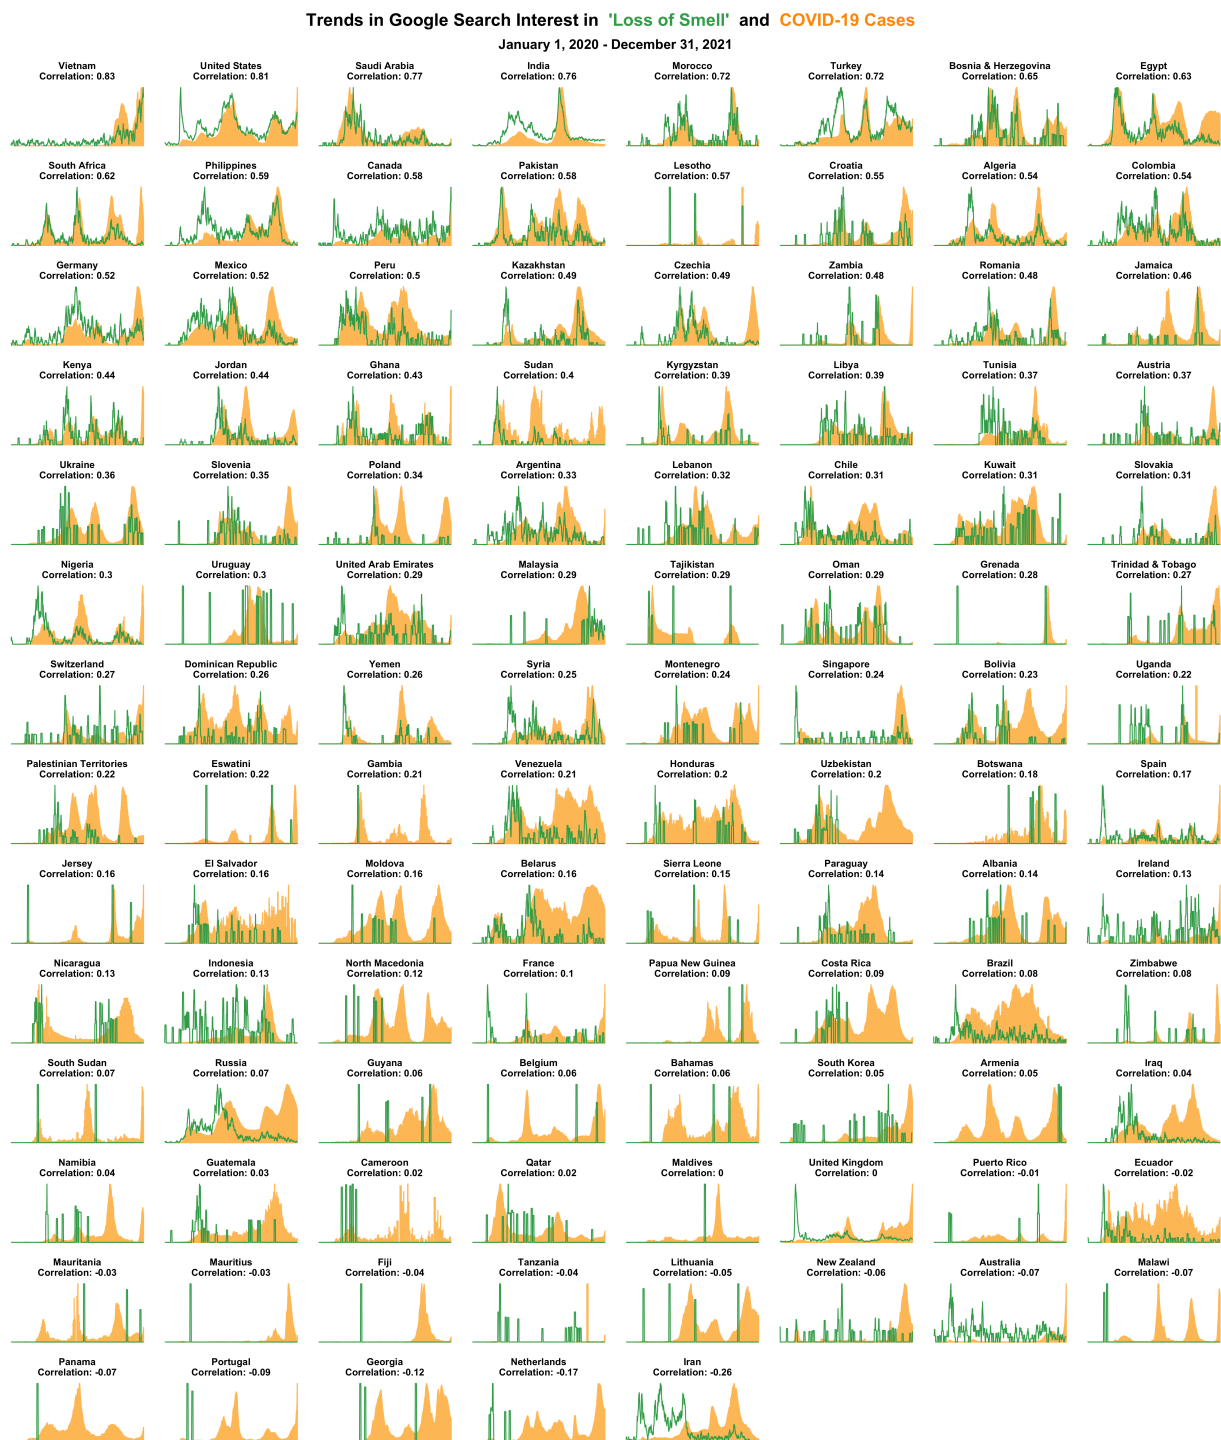

**Figure S4:** Trends between search interest and COVID-19 Cases for Select Countries

## S7 Trends in Search Interest and COVID-19 Cases Among Countries with Recent Surges in Cases

Figure S5 shows trends in search interest in “Loss of Smell”, a more general symptom search term (“Fever”), a more general COVID search term (“COVID Symptoms”), and COVID-19 cases for six example countries that saw COVID-19 cases surge towards the end of 2021, in many cases driven by the Omicron variant. The figure illustrates mixed results in search interest moving with the recent increase in COVID-19 cases. For example, search interest in “Loss of Smell” increases with the recent rise in cases in the United States, but not other countries; in addition, search interest in “Fever” increases with the recent rise in cases in France, Italy, and the United States, but not other countries. However, “COVID Symptoms” increases with the recent rise in cases in all countries considered.

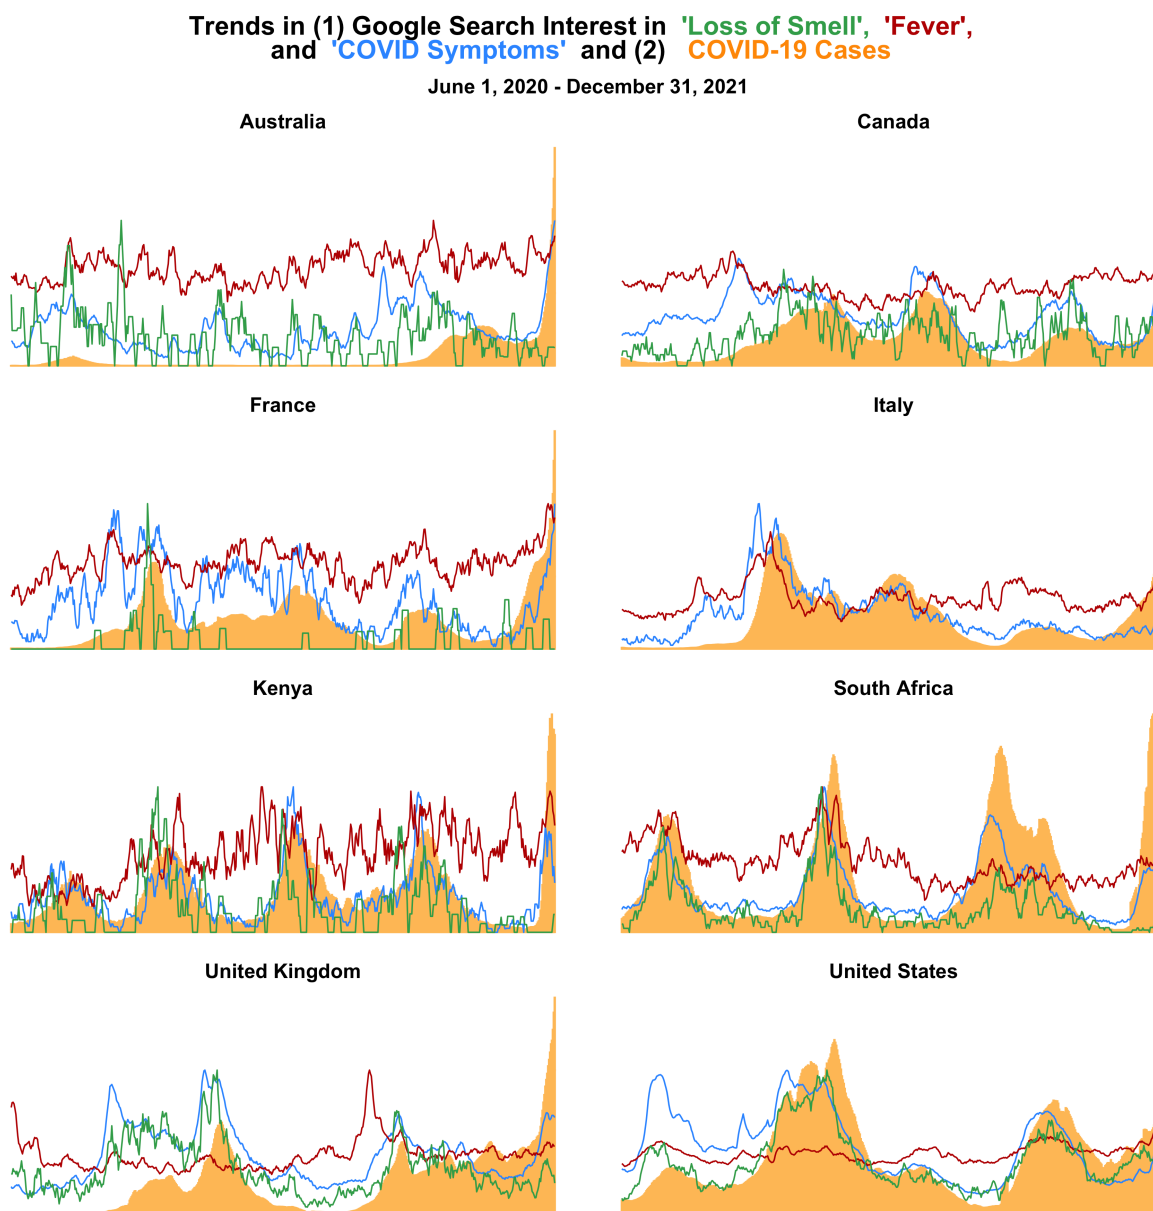

**Figure S5:** Trends between search interest and COVID-19 Cases for Select Countries

## S8 Explaining Correlation Between Search Interest and COVID-19 Cases: Additional Results

We estimate OLS models explaining the correlation between “Loss of Smell” and COVID-19 cases with select covariates. The results show that GDP per capita, percent of the population using internet and the number of mobile cell phone subscribers per 100 are not not associated with the correlation. Here, we test whether these results hold using the correlation between “Loss of Taste” and COVID-19 cases, and “COVID Symptoms” and COVID-19 cases.

Tables S7 and S8 show regression results using the correlation with “Loss of Taste” and “COVID Symptoms” respectively and figures S6 - S9 show scatterplots between all dependent variables and covariates. Results using “Loss of Taste” are nearly identical to those using “Loss of Smell.” Results using the correlation between “COVID Symptoms” and COVID-19 cases show that GDP per capita is associated with a 3% increase ( $p < 0.1$ ) in the correlation without additional covariates (column 4) and with a 11% increase ( $p < 0.05$ ) in the correlation when including additional covariates (column 5). While these results show that more wealthy countries tend to see stronger correlations, these models explain—at best—10% of the variation in the correlation. Figure S9 emphasizes that while there is a slight positive association between GDP per capita and the correlation between “COVID Symptoms” and COVID-19 cases, the association is rough—with many countries with low GDP per capita seeing high correlations.

|                           | <i>Dependent variable:</i> |                   |                  |                |                    |                 |                   |                     |                    |                   |
|---------------------------|----------------------------|-------------------|------------------|----------------|--------------------|-----------------|-------------------|---------------------|--------------------|-------------------|
|                           | Correlation                |                   |                  |                |                    | Best Lag        |                   |                     |                    |                   |
|                           | (1)                        | (2)               | (3)              | (4)            | (5)                | (6)             | (7)               | (8)                 | (9)                | (10)              |
| Total COVID-19 Cases, log | 0.04***<br>(0.01)          |                   |                  |                | 0.06***<br>(0.02)  | -0.07<br>(0.56) |                   |                     |                    | -0.63<br>(0.81)   |
| Per Pop. Using Internet   |                            | 0.0001<br>(0.001) |                  |                | -0.003<br>(0.002)  |                 | 0.01<br>(0.05)    |                     |                    | -0.11<br>(0.11)   |
| Mobile Cell Sub. per 100  |                            |                   | 0.001<br>(0.001) |                | -0.0001<br>(0.001) |                 |                   | 0.03<br>(0.04)      |                    | -0.02<br>(0.05)   |
| GDP Per Cap, Log          |                            |                   |                  | 0.02<br>(0.02) | 0.02<br>(0.04)     |                 |                   |                     | 0.97<br>(0.79)     | 2.80<br>(1.92)    |
| Constant                  | -0.23<br>(0.15)            | 0.25***<br>(0.08) | 0.17*<br>(0.09)  | 0.10<br>(0.15) | -0.52*<br>(0.29)   | -8.27<br>(7.43) | -8.52**<br>(3.80) | -12.48***<br>(4.36) | -17.88**<br>(7.13) | -14.98<br>(13.89) |
| Observations              | 105                        | 80                | 97               | 103            | 79                 | 105             | 80                | 97                  | 103                | 79                |
| Adjusted R <sup>2</sup>   | 0.08                       | -0.01             | -0.003           | -0.001         | 0.11               | -0.01           | -0.01             | -0.004              | 0.01               | -0.02             |

**Table S7:** Explaining correlation between search interest in “Loss of Taste” and COVID-19 Cases

|                           | <i>Dependent variable:</i> |                   |                   |                 |                     |                   |                  |                 |                 |                   |
|---------------------------|----------------------------|-------------------|-------------------|-----------------|---------------------|-------------------|------------------|-----------------|-----------------|-------------------|
|                           | Correlation                |                   |                   |                 |                     | Best Lag          |                  |                 |                 |                   |
|                           | (1)                        | (2)               | (3)               | (4)             | (5)                 | (6)               | (7)              | (8)             | (9)             | (10)              |
| Total COVID-19 Cases, log | 0.03***<br>(0.01)          |                   |                   |                 | 0.04**<br>(0.02)    | -0.71**<br>(0.34) |                  |                 |                 | -1.44**<br>(0.56) |
| Per Pop. Using Internet   |                            | 0.001<br>(0.001)  |                   |                 | -0.01***<br>(0.003) |                   | -0.03<br>(0.04)  |                 |                 | -0.09<br>(0.09)   |
| Mobile Cell Sub. per 100  |                            |                   | 0.0003<br>(0.001) |                 | 0.0004<br>(0.001)   |                   |                  | -0.03<br>(0.03) |                 | -0.03<br>(0.04)   |
| GDP Per Cap, Log          |                            |                   |                   | 0.03*<br>(0.02) | 0.12***<br>(0.04)   |                   |                  |                 | -0.42<br>(0.58) | 2.72*<br>(1.60)   |
| Constant                  | -0.001<br>(0.12)           | 0.27***<br>(0.08) | 0.27***<br>(0.10) | 0.05<br>(0.14)  | -0.89***<br>(0.31)  | 0.94<br>(4.23)    | -5.30*<br>(2.68) | -4.85<br>(3.41) | -4.16<br>(5.24) | -4.08<br>(11.23)  |
| Observations              | 138                        | 95                | 113               | 131             | 92                  | 138               | 95               | 113             | 131             | 92                |
| Adjusted R <sup>2</sup>   | 0.04                       | -0.01             | -0.01             | 0.02            | 0.12                | 0.02              | -0.003           | -0.002          | -0.004          | 0.05              |

**Table S8:** Explaining correlation between search interest in “Loss of Smell” and COVID-19 Cases

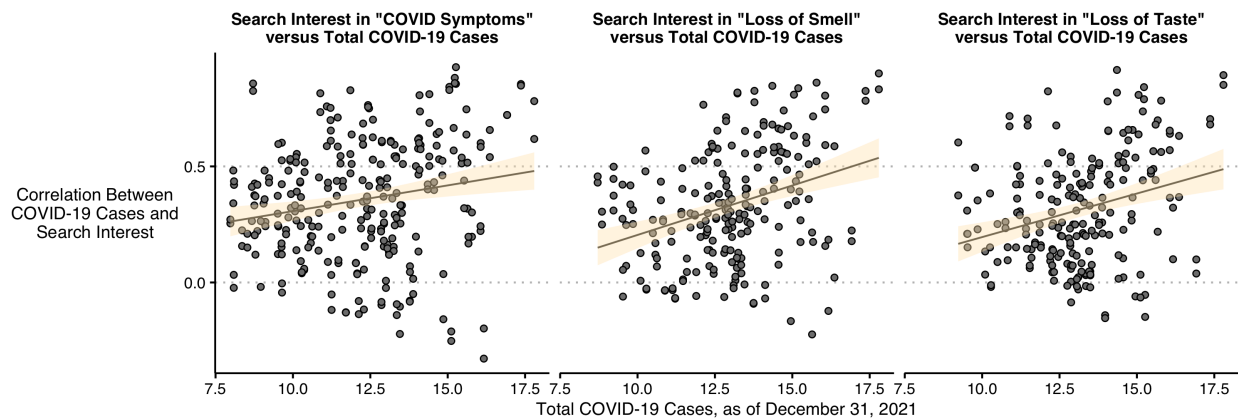

**Figure S6:** Scatterplots showing association between (1) correlation of search interest and COVID-19 cases and (2) total COVID-19 cases as of December 31, 2021, for search interest in “COVID Symptoms”, “Loss of Smell”, and “Loss of Taste.”

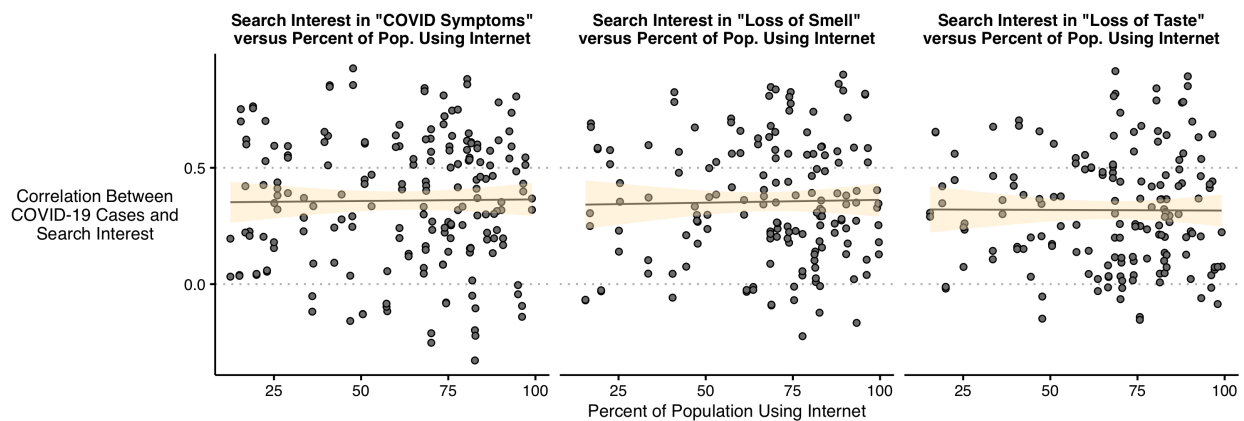

**Figure S7:** Scatterplots showing association between (1) correlation of search interest and COVID-19 cases and (2) percent of the population using internet, for search interest in “COVID Symptoms”, “Loss of Smell”, and “Loss of Taste.”

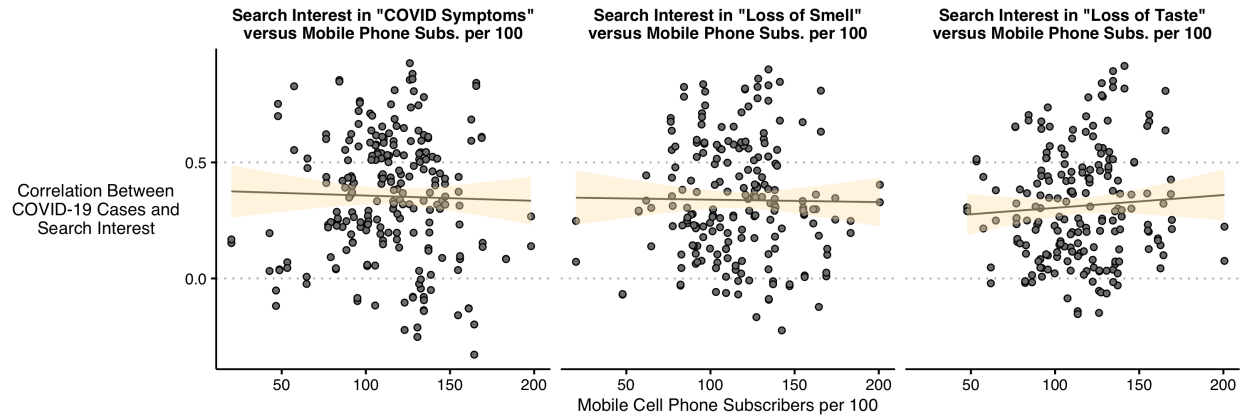

**Figure S8:** Scatterplots showing association between (1) correlation of search interest and COVID-19 cases and (2) mobile cell phone subscribers per 100, logged, for search interest in “COVID Symptoms”, “Loss of Smell”, and “Loss of Taste.”

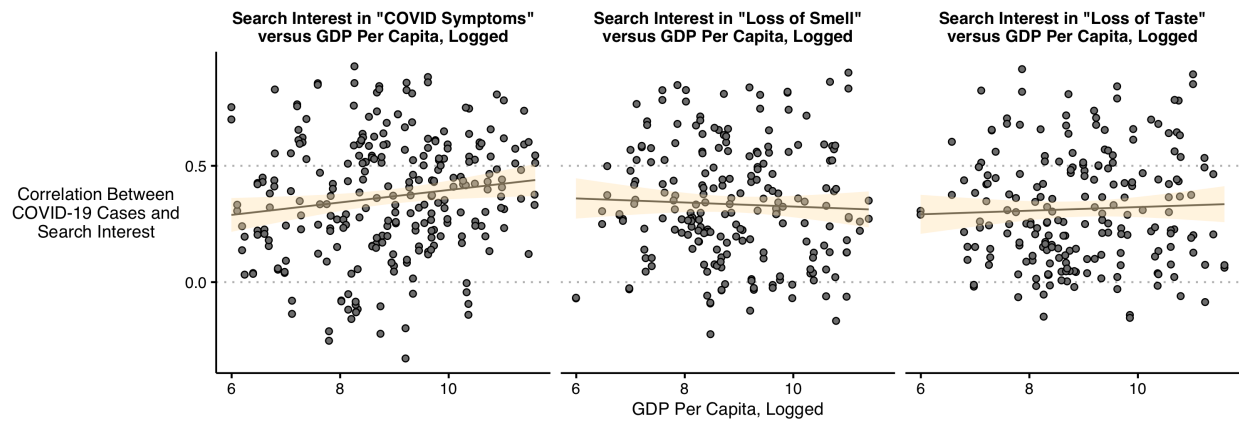

**Figure S9:** Scatterplots showing association between (1) correlation of search interest and COVID-19 cases and (2) GDP per capita, logged, for search interest in “COVID Symptoms”, “Loss of Smell”, and “Loss of Taste.”

## S9 Impact of Containment Policies on Search Interest: Event Study Results

Our primary approach to estimate the impact of containment policies on search interest relies on a difference-in-difference approach. As a robustness check, we also estimate results relying on an event-study approach; figure S9 shows results using data 90 days before and after the first containment policy for each country, where results are largely consistent with difference-in-difference results.

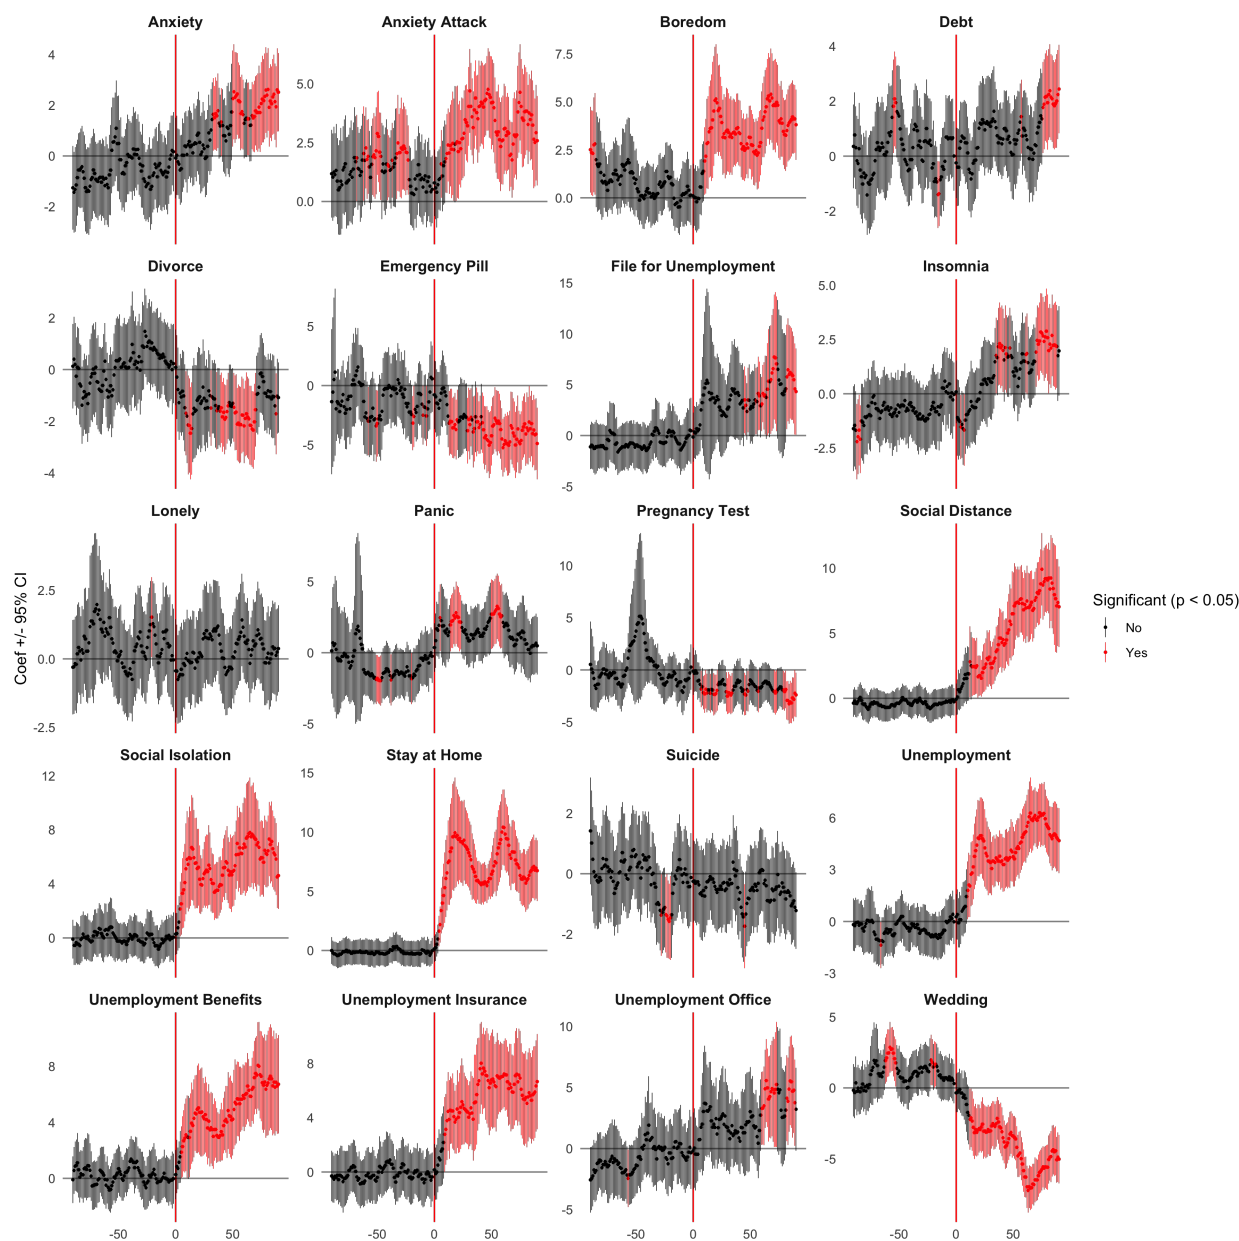

**Figure S10:** Event study examining the impact of containment policies on search interest. 95% confidence intervals shown for each coefficient.

## **S10    Impact of Containment Policies on Search Interest: Sensitivity Analysis Across Different Day Thresholds**

To estimate the impact of containment policies on search interest, our primary model relies on using days three months (90 days) before and after the date of the first containment policy. This section shows results using 30, 60 and 120 day thresholds.



### A. Trends in Search Interest

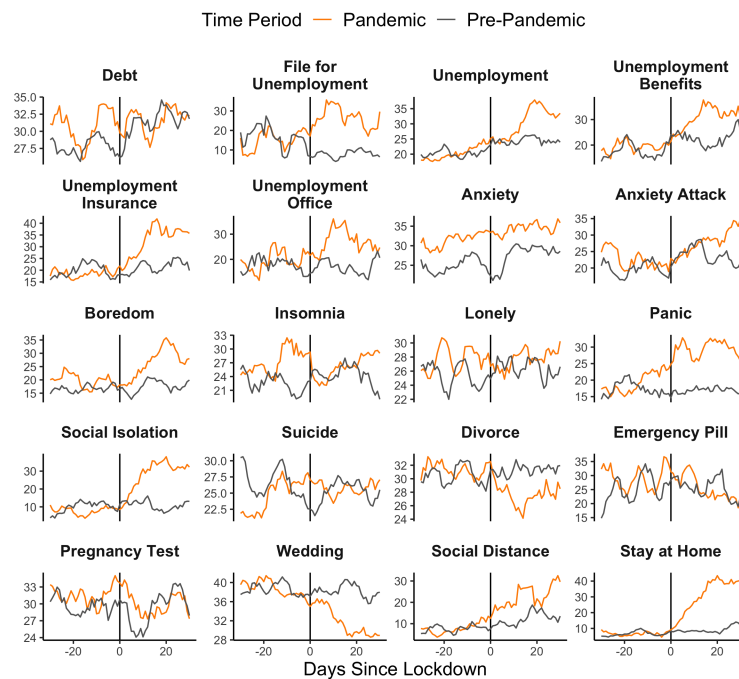

### B. Diff-in-Diff Results: Impact of Containment Policies on Search Interest

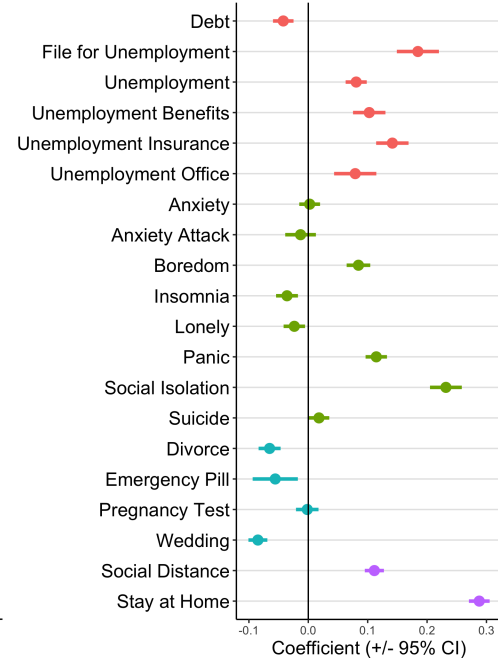

### C. Diff-in-Diff Results: Heterogeneity of Impacts of Containment Policies on Search Interest by Levels of Economic Support, Containment Policy Restrictiveness, and per capita GDP

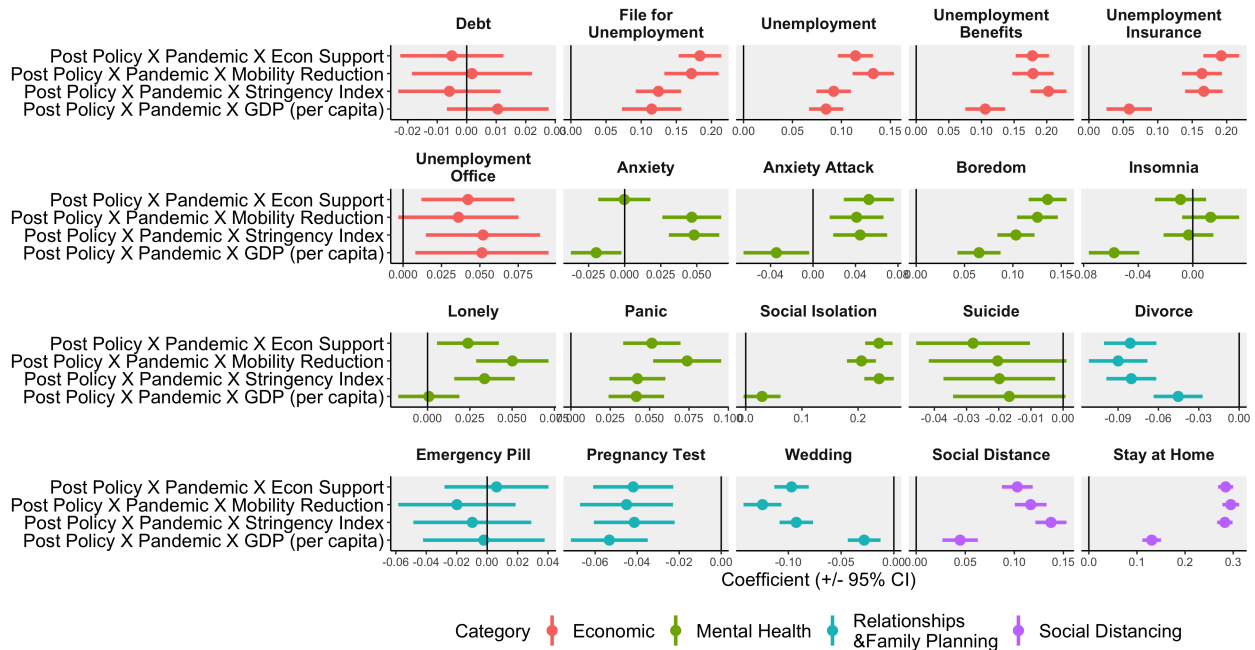

**Figure S11: Impact of COVID-19 Policies on Search Interest using a 30 day threshold.** Panel A shows average search interest across all countries with available data on Google Trends. Before averaging, search interest values for each country are standardized between 0 and 100. Panel B shows difference-in-differences results showing the overall impact of containment policies across search terms. Only the difference-in-differences coefficient is reported. Panel C shows difference-in-differences results that explore heterogeneity of impacts across containment policy restrictiveness, economic support, and GDP per capita. In panels B and C, point estimates and 95% confidence intervals are shown.

## A. Trends in Search Interest

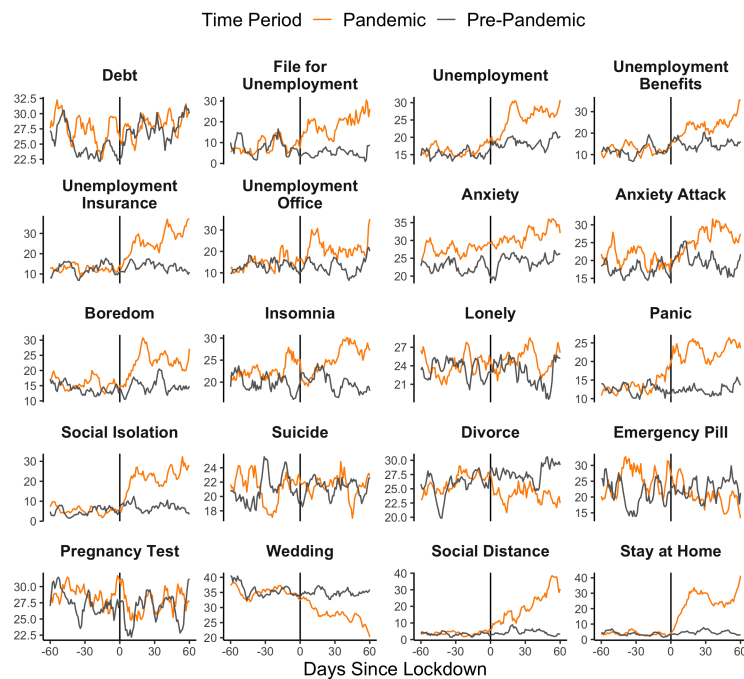

## B. Diff-in-Diff Results: Impact of Containment Policies on Search Interest

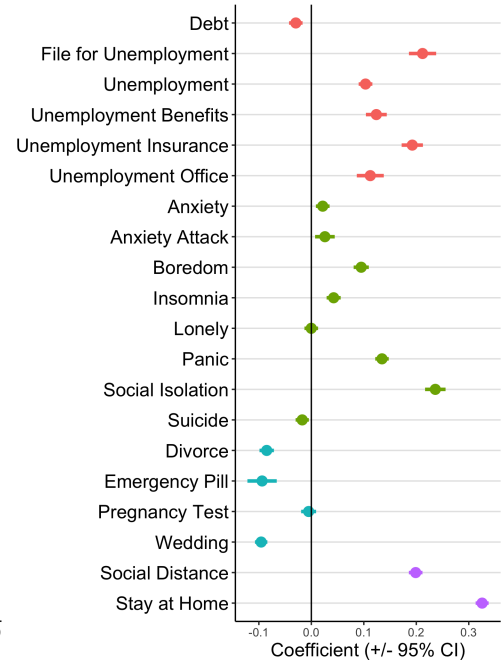

## C. Diff-in-Diff Results: Heterogeneity of Impacts of Containment Policies on Search Interest by Levels of Economic Support, Containment Policy Restrictiveness, and per capita GDP

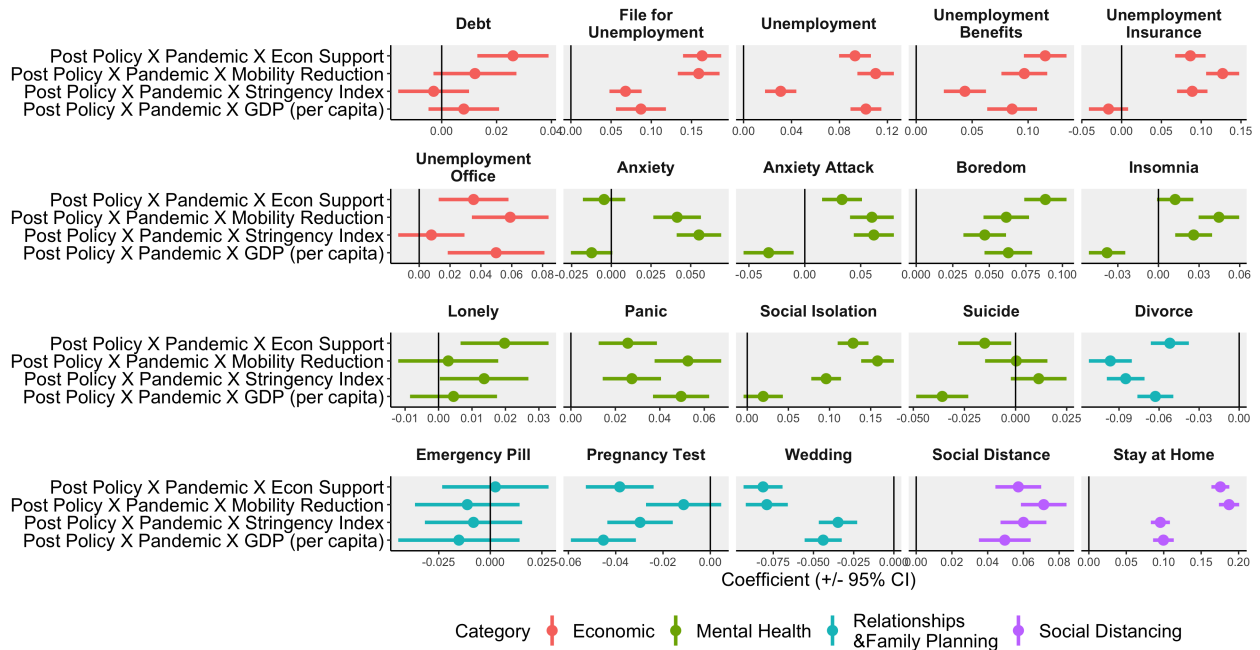

**Figure S12: Impact of COVID-19 Policies on Search Interest using a 60 day threshold.** Panel A shows average search interest across all countries with available data on Google Trends. Before averaging, search interest values for each country are standardized between 0 and 100. Panel B shows difference-in-differences results showing the overall impact of containment policies across search terms. Only the difference-in-differences coefficient is reported. Panel C shows difference-in-differences results that explore heterogeneity of impacts across containment policy restrictiveness, economic support, and GDP per capita. In panels B and C, point estimates and 95% confidence intervals are shown.

### A. Trends in Search Interest

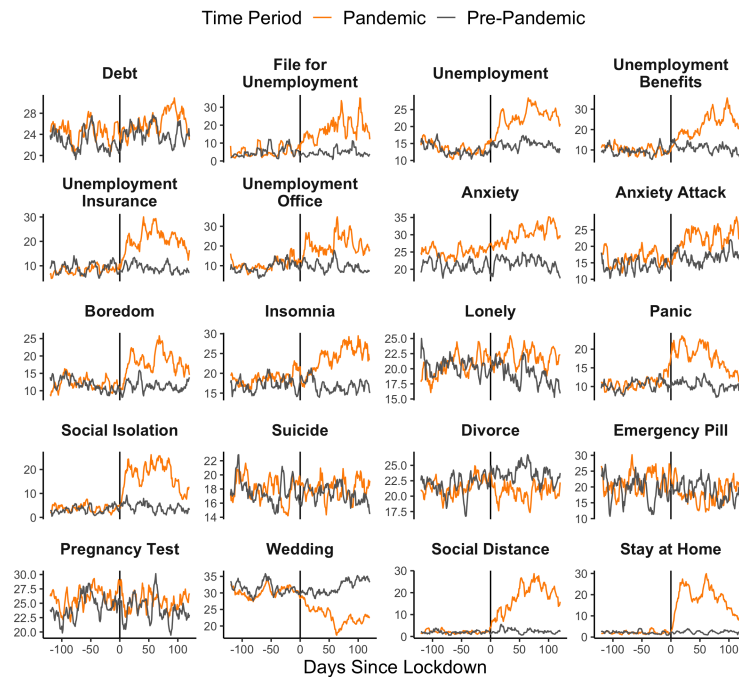

### B. Diff-in-Diff Results: Impact of Containment Policies on Search Interest

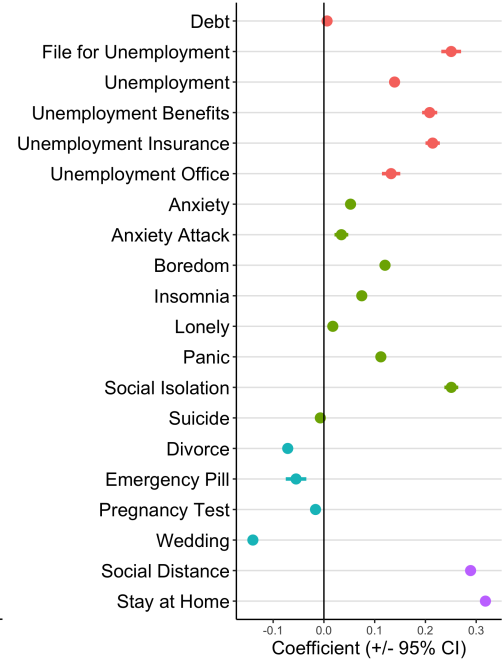

### C. Diff-in-Diff Results: Heterogeneity of Impacts of Containment Policies on Search Interest by Levels of Economic Support, Containment Policy Restrictiveness, and per capita GDP

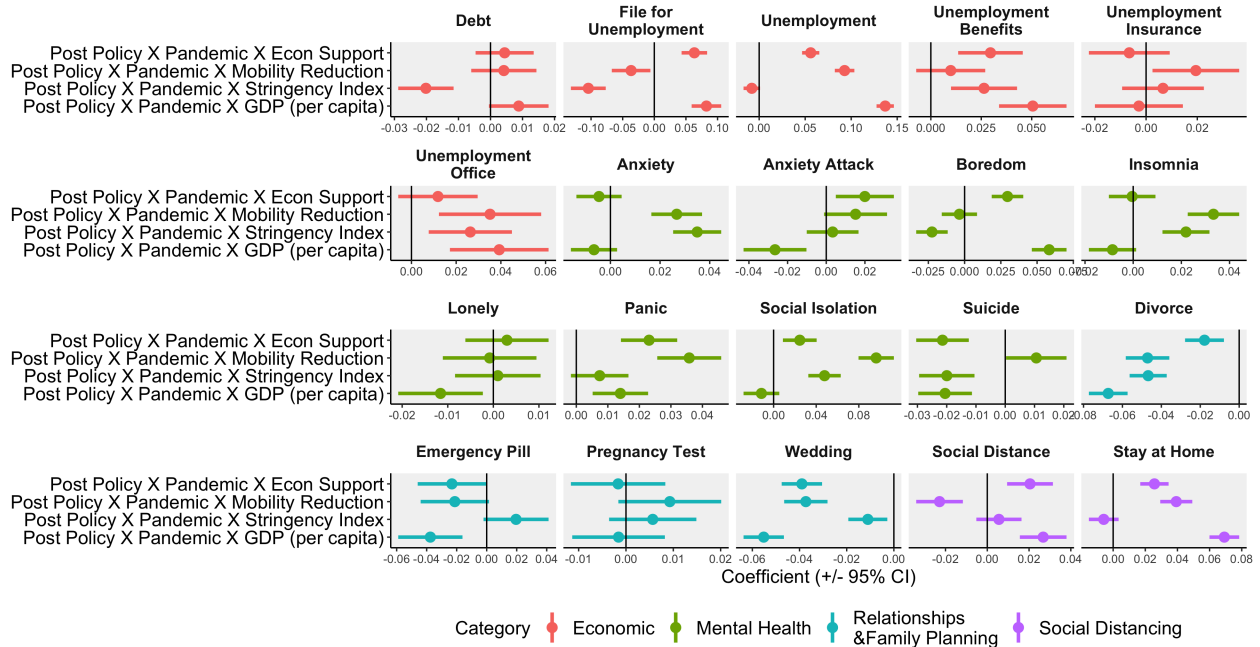

**Figure S13: Impact of COVID-19 Policies on Search Interest using a 120 day threshold.** Panel A shows average search interest across all countries with available data on Google Trends. Before averaging, search interest values for each country are standardized between 0 and 100. Panel B shows difference-in-differences results showing the overall impact of containment policies across search terms. Only the difference-in-differences coefficient is reported. Panel C shows difference-in-differences results that explore heterogeneity of impacts across containment policy restrictiveness, economic support, and GDP per capita. In panels B and C, point estimates and 95% confidence intervals are shown.

## S11 Correlation of Daily Vaccination Rates and Search Interest, Separated by per Capita GDP

Figure S14 shows the distribution of within-country correlations of daily vaccination rates and search interest across vaccine related search terms, where we separately show the distributions across higher and lower income countries (we distinguish higher and lower income countries using the median per capita GDP across countries).

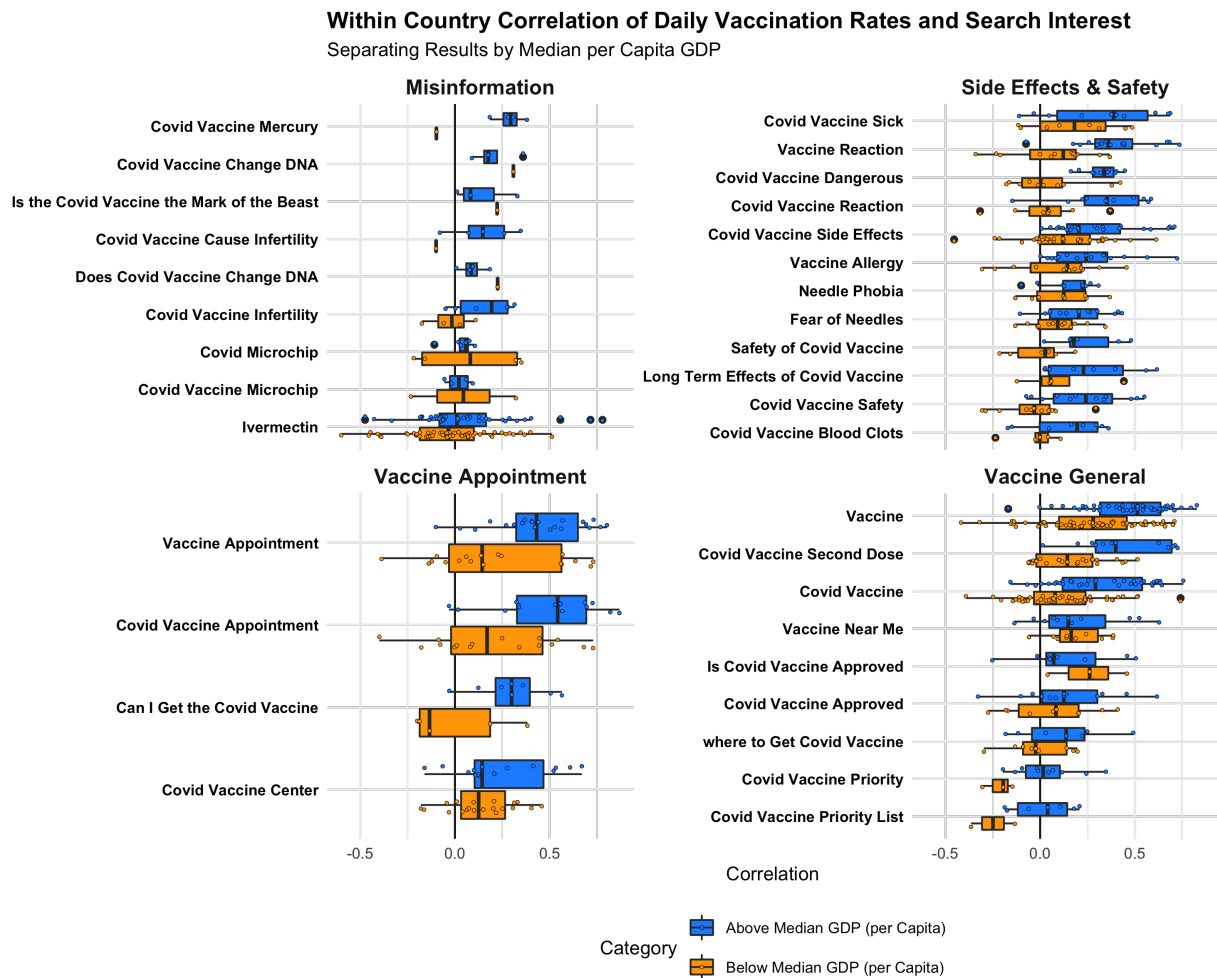

**Figure S14:** Distribution of within country correlation of daily vaccination rates and search interest, separating results by median per capital GDP. The boxplots include: center line, median; box limits, upper and lower quartiles; whiskers, 1.5x interquartile range; points beyond whiskers, outliers.

## References

- [1] Google Help. FAQ about google trends data. <https://support.google.com/trends/answer/4365533?hl=en>. Accessed: 2022-01-15.
